# Supplementary material for: MEDI3039, a novel highly potent tumor necrosis factor (TNF)-related apoptosis-inducing ligand (TRAIL) receptor 2 agonist, causes regression of orthotopic tumors and inhibits outgrowth of metastatic triple-negative breast cancer
Source: Springer Nature journal article supplement (doi:10.1186/s13058-019-1116-1), 2019-02-18
Supplement: MOESM3 [file 16488912]

| <b>Group</b>   | <b>cell line</b> | <b>GST-TRAIL<br/>(IC50, pM)</b> | <b>MEDI3039<br/>(IC50, pM)</b> | <b>fold<br/>difference</b> |
|----------------|------------------|---------------------------------|--------------------------------|----------------------------|
| ER+            | T47D             | >100,000.00                     | > 1,000.00                     | N.D.                       |
|                | MCF7             | 7,422.00                        | 8.92                           | 832.25                     |
|                | HCC1500          | 2,410.00                        | 4.22                           | 571.63                     |
|                | ZR75-1           | 2,184.00                        | 0.61                           | 3563.39                    |
|                | BT474            | >100,000.00                     | > 1,000.00                     | N.D.                       |
| HER2 amplified | MB453            | 15,038.00                       | 245.80                         | 61.18                      |
|                | SKBR3-ATCC       | >100,000.00                     | >1,000.00                      | N.D.                       |
|                | HCC1954          | 1,734.00                        | 6.97                           | 248.78                     |
|                | AU565            | 1,757.00                        | 2.90                           | 606.91                     |
| TNBC BasalA    | HCC1599          | >100,000.00                     | >1,000.00                      | N.D.                       |
|                | HCC1937          | 1,990.00                        | 3.87                           | 514.61                     |
|                | MB468            | 1,268.00                        | 7.83                           | 161.92                     |
|                | HCC1187          | 988.70                          | 0.90                           | 1093.21                    |
|                | BT20             | 464.40                          | 0.38                           | 1235.76                    |
| TNBC BasalB    | MB231            | 623.90                          | 4.71                           | 132.46                     |
|                | Hs578T           | 447.80                          | 1.84                           | 242.97                     |
|                | MB436            | 80.20                           | 0.15                           | 532.89                     |
|                | BT549            | 66.44                           | 0.22                           | 308.74                     |
|                | HCC38            | 6.73                            | 0.06                           | 115.71                     |
