# Supplementary material for: MEDI3039, a novel highly potent tumor necrosis factor (TNF)-related apoptosis-inducing ligand (TRAIL) receptor 2 agonist, causes regression of orthotopic tumors and inhibits outgrowth of metastatic triple-negative breast cancer
Source: Springer Nature journal article supplement (doi:10.1186/s13058-019-1116-1), 2019-02-18
Supplement: MOESM5 [file 16488912]

**A**

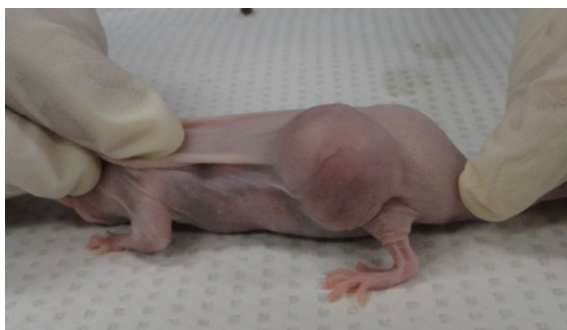

**B**

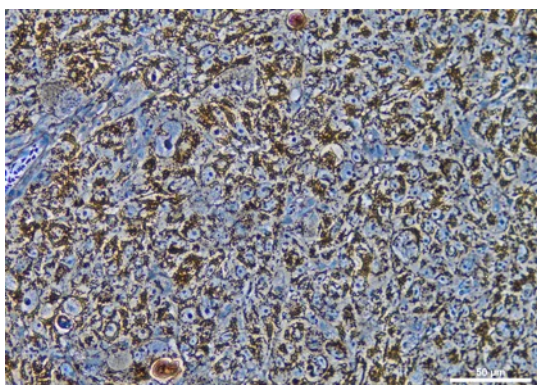

Anti-human mitochondria  
antibody [MTC02], ab79479

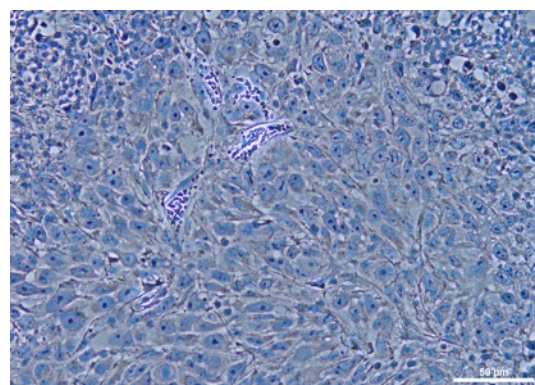

IgG Ctl.
